# Supplementary material for: Pulmonary Toxicity of Realistic Alveolar Deposition Concentrations of Ultrafine Particulate Matters in Human Normal Bronchial Epithelial Cell
Source: Research Square preprint supplement (doi:10.21203/rs.3.rs-314374/v1), 2021-03-19
Supplement: Supplementary file 1 [file d385f2ac67fcab31a0a04811.docx]

# Supplementary Material

**Table S1.** Daily mean concentration and alveolar deposition doses of UFPM

|  | UFPM (µg/m3) |
| --- | --- |
| Daily mean concentration | 12.1 ± 6.03 (7.18–23.4) |
|  | UFPM (µg/day) |
| 8 h Alveolar deposition dose | 3.70 ± 1.85 (2.20–7.17) |
| 24 h Alveolar deposition dose | 11.1 ± 5.54 (6.60–21.5) |
| 48 h Alveolar deposition dose | 22.2 ± 4.85 (13.2–43.0) |
| 72 h Alveolar deposition dose | 33.3 ± 7.28 (19.8–64.5) |

**Table S2.** PAH concentrations in UFPM

| PAHs | pg/m3 |
| --- | --- |
| Naphthalene | 60.42 |
| 2-Methylnaphthalene | 24.65 |
| Acenaphthylene | 5.324 |
| Acenaphthene | 1.042 |
| Fluorene | 7.407 |
| Phenanthrene | 76.85 |
| Anthracene | 13.19 |
| Fluoranthene | 68.63 |
| Pyrene | 61.81 |
| Benzo(a)anthracene | 82.18 |
| Chrysene | 145.9 |
| Benzo(b)fluoranthene | 395.1 |
| Benzo(k)fluoranthene | 263.5 |
| Benzo(e)pyrene | 186.9 |
| Benzo(a)pyrene | 174.4 |
| Perylene | 28.01 |
| Indeno(1,2,3-c,d)pyrene | 692.6 |
| Dibenz(a,h)anthracene | 173.6 |
| Benzo(g,h,i)perylene | 956.0 |

**Table S3.** Concentrations of metallic elements in UFPM

| Metal | Concentration (pg/m3) |
| --- | --- |
| Al | 1.784 |
| Mn | 0.032 |
| Fe | 233.3 |
| Co | 0.046 |
| Ni | 0.388 |
| Cu | 0.032 |
| Zn | 0.662 |
| As | 0.137 |
| Sr | 595.4 |
| Ag | 0.074 |
| Cd | 0.021 |
| Pb | 0.001 |
